# Supplementary material for: An ultra-stable CuI12 cluster built from a CuI6 precursor sandwiched by two CuI3-thiacalixarene units for efficient photothermal conversion
Source: Royal Society of Chemistry journal article supplement (doi:10.1039/d3qi00479a), 2023-01-01
Supplement: d3qi00479a1.pdf [file d3qi00479a1.pdf]

## Supporting Information

### **An ultra-stable Cu<sup>I</sup><sub>12</sub> cluster built from a Cu<sup>I</sup><sub>6</sub> precursor sandwiched by two Cu<sup>I</sup><sub>3</sub>-thiacalixarene units for efficient photothermal conversion**

Zuohu Zhou, Linmeng Xu, Guiyan Zhao,\* Kun, Zhou, Baokuan Chen, Yanfeng Bi\*

*School of Petrochemical Engineering, Liaoning Petrochemical University, Fushun,*

*Liaoning 113001 (P. R. China). E-mail: [gyzhao@lnpu.edu.cn](mailto:gyzhao@lnpu.edu.cn) (G. Y. Zhao);*

*[biyanfeng@lnpu.edu.cn](mailto:biyanfeng@lnpu.edu.cn) (Y. F. Bi)*

## ESI Contents

(1) Experimental details (p2-p3)

(2) Figures (H<sub>4</sub>TC4A, PXRD pattern, FT-IR spectrum, TGA curve, Crystal structure, XPS spectrum (p4-p8)

(3) Tables (Crystal Data, bond lengths, bond angles for Cu<sub>12</sub>) (p9-p12)

## 1 Experiment

### 1.1 Synthesis of $\text{Cu}_6(\text{2-PyS})_6$ (2-PySH = 2-Pyridinethiol)

A mixture of 2-Pyridinethiol (0.22 g, 2.0 mmol), CuCl (0.20 g, 2.0 mmol), MeOH (5.0 mL), and DMA (5.0 mL) in a 20 mL Teflon-lined autoclave which was kept at 130 °C for one day and then slowly cooled to 20 °C. ca. 0.20 g red block crystals were obtained in 60.0% yield (basis on copper atom). The crystals were isolated by filtration and then washed with 1:1 MeOH-DMA and dry in air.

### 1.2 Chemical stability of $\text{Cu}_{12}$

$\text{Cu}_{12}$  is ultra-stable in the air by comparing the PXRD patterns from single-crystal X-ray diffraction (SCRD) with that exposure for 6 months. We also tested the stability of  $\text{Cu}_{12}$  under different conditions. We soaked  $\text{Cu}_{12}$  in 1 M HCl or 1 M NaOH for 48 h or soaked it in 1 M  $\text{H}_2\text{O}_2$  solution for 6 h. Furthermore, we soaked freshly prepared  $\text{Cu}_{12}$  in various solvents for 48 h, including DMA, acetonitrile, acetone, dichloromethane, trichloromethane, methanol, ethanol, and mixed solvent (DMA: ethanol=1:1). The crystallization of  $\text{Cu}_{12}$  is maintained well, suggesting the outstanding stability of  $\text{Cu}_{12}$  in water solutions and various organic solvents.

### 1.3 Density functional theory (DFT) calculations

The model structure was obtained from single-crystal X-ray diffraction. The structure was optimized in Gaussian 16 program (Gaussian 16, Revision C. 01. Gaussian, Inc., Wallingford CT. 2016) with B3LYP functional,<sup>1</sup> def2-SVP base set,<sup>2</sup> and DFT-D3 dispersion correction.<sup>3</sup> Multiwfn, a multifunctional wave function analysis program<sup>4</sup>, is used to generate the lattice file of molecular orbitals, and the three-dimensional graph is drawn by the VMD program.<sup>5</sup>

### 1.4 Solid photothermal experiment:

The light source is a 660 nm laser, with a light intensity of 0.4 W•cm<sup>2</sup>. The sample was made into 1 cm<sup>2</sup> slice on 2.0 × 2.0 cm<sup>2</sup> glass sheets, and the distance between the laser lamp and the sample was changed to make the spot completely coincide with the sample. The temperature of the sample was measured by FL-IR infrared thermography. The test environmental conditions are kept at ca. 20 °C and humidity 30 %.

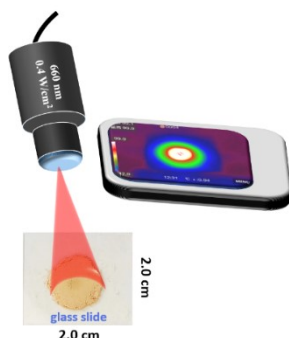

Diagram of the photothermal experiment for solid

### 1.5 Solvent photothermal experiment:

Add 15 mg of the  $\text{Cu}_{12}$  to 0.5 mL of  $\text{H}_2\text{O}$  or DMF, and the solid  $\text{Cu}_{12}$  was irradiated under a 660 nm laser with a power density of  $0.4 \text{ W/cm}^2$ , and the temperature was recorded by a thermal imager.

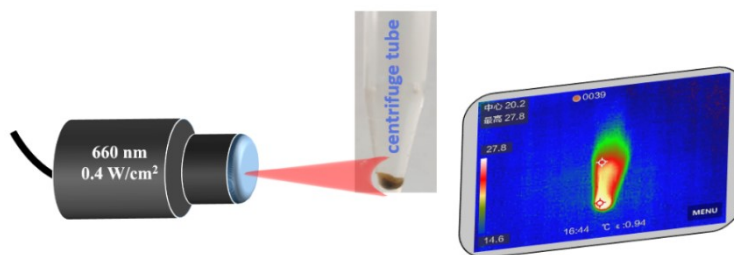

Diagram of the photothermal experiment in solvent

### References

- 1 T. Yanai, D. P. Tew and N. C. Handy, A new hybrid exchange-correlation functional using the Coulomb-attenuating method (CAM-B3LYP), *Chem. Phys. Lett.*, 2004, **393**, 51–57.
- 2 F. Weigend and R. Ahlrichs, Balanced basis sets of split valence, triple zeta valence and quadruple zeta valence quality for H to Rn: Design and assessment of accuracy *Phys. Chem. Chem. Phys.*, 2005, **7**, 3297.
- 3 S. Grimme, Density functional theory with London dispersion corrections, *WIREs Comput Mol Sci*, 2011, **1**, 211–228.
- 4 T. Lu and F.-W. Chen, Multiwfn: A multifunctional wavefunction analyzer, *J. Comput. Chem.*, 2012, **33**, 580–592.
- 5 W. Humphrey, A. Dalke and K. Schulten, VMD: Visual molecular dynamics *J. Mol. Graph. Model.*, 1996, **14**, 33–38.

## Figures

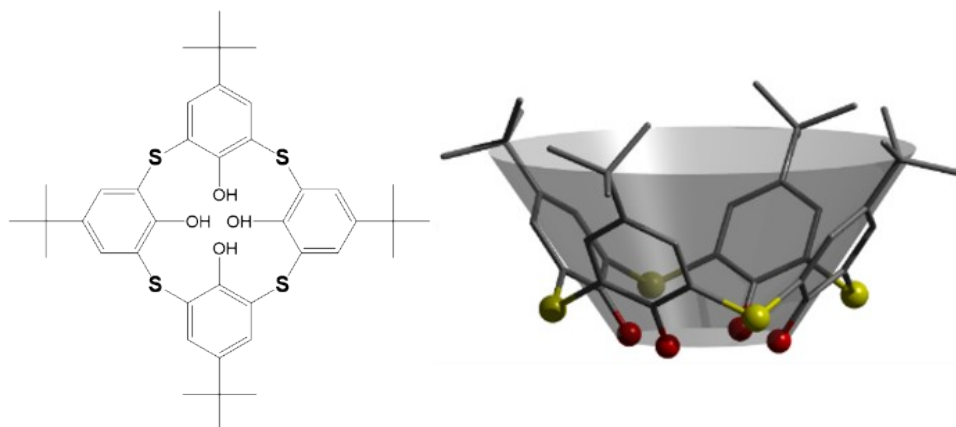

Fig. S1 *p*-*tert*-Butylthiacalix[4]arene (H<sub>4</sub>TC4A)

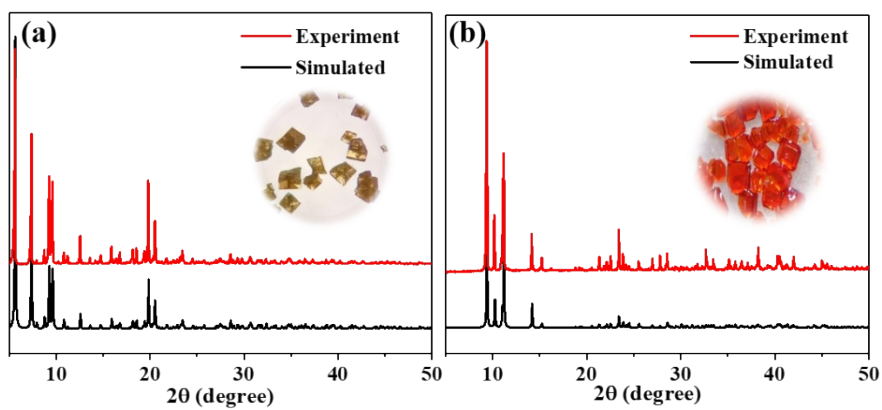

Fig. S2 (a) The XRD patterns of Cu<sub>12</sub>. (b) The XRD patterns of Cu<sub>6</sub>.

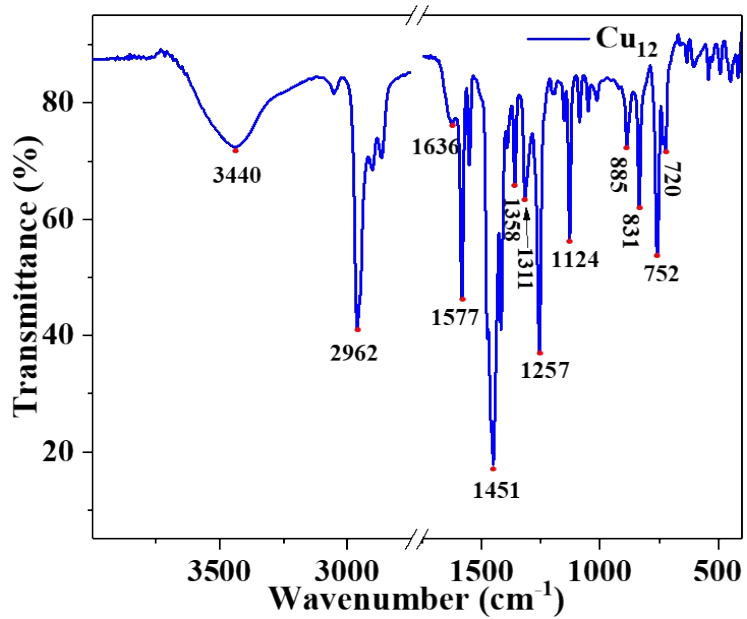

Fig. S3 FT-IR spectra of the Cu<sub>12</sub>

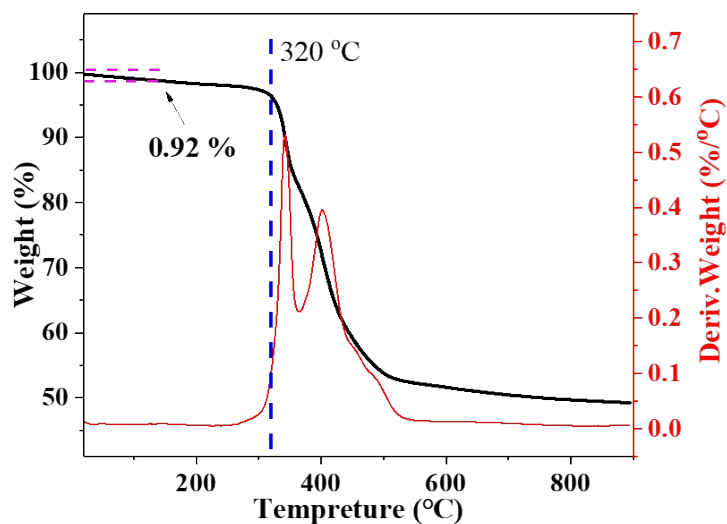

**Fig. S4** Thermogravimetric curve of  $\text{Cu}_{12}$

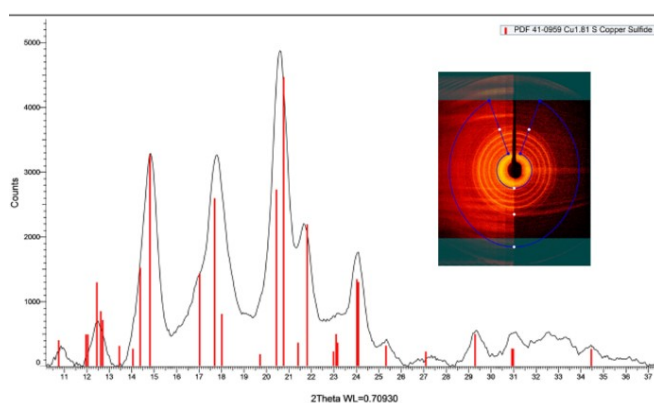

**Fig. S5** The PXRD of the final decomposition from TGA

For investigating the thermal stability of  $\text{Cu}_{12}$ , the thermogravimetric analysis was carried out under an  $\text{N}_2$  atmosphere from 20 to 900 $^{\circ}\text{C}$  with a heating rate of 10 $^{\circ}\text{C min}^{-1}$  (**Fig. S4**). The weight loss is 0.92% below 100 $^{\circ}\text{C}$ , which was close to the theoretical 0.63% of releasing one water molecule per  $\text{Cu}_{12}$ . The  $\text{Cu}_{12}$  can keep its skeleton before 320  $^{\circ}\text{C}$ . Then significant weight loss (49.2%) took place until the curve reached relatively stable. The residue was determined to be  $\text{Cu}_{1.81}\text{S}$  according to PXRD analysis (**Fig. S5**).

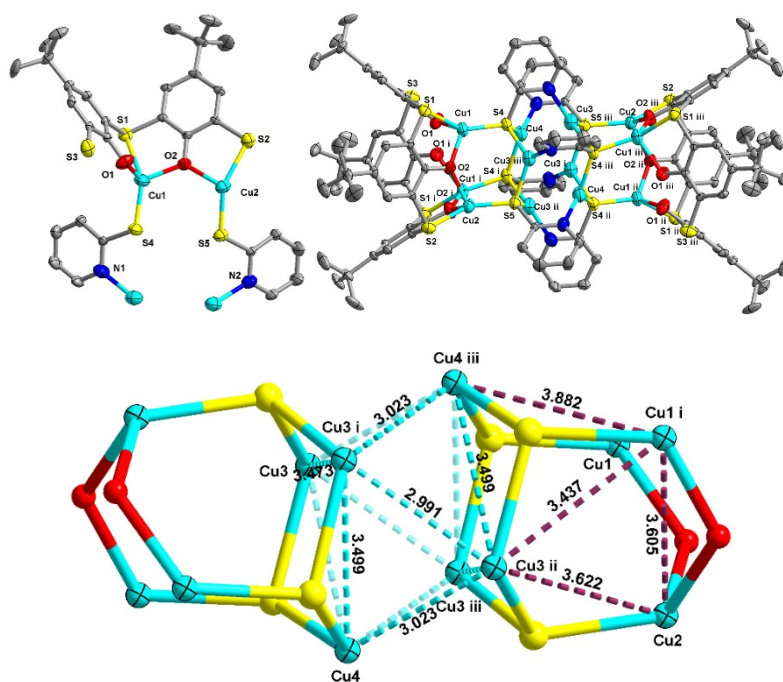

**Fig. S6** Asymmetric unit and metal coordination environment of  $\text{Cu}_{12}$  (up) and  $\text{Cu}\cdots\text{Cu}$  distance (Å) in  $\text{Cu}_{13}$ -HTC4A and “ $\text{Cu}_6(2\text{-PyS})_6$ ” units (below).

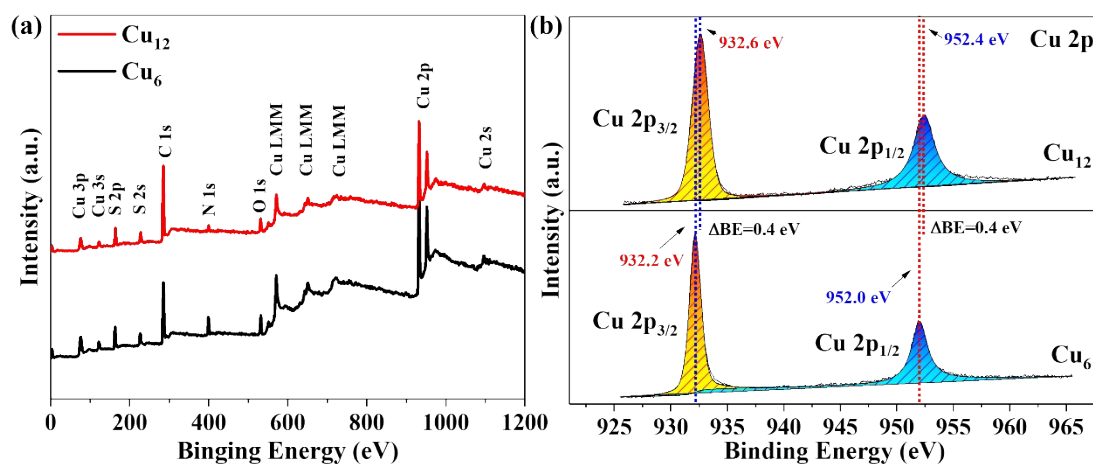

**Fig. S7** (a) XPS spectrum and (b) High-resolution XPS spectra of Cu 2p for  $\text{Cu}_{12}$  and  $\text{Cu}_6$ .

XPS spectrum revealed the presence of the cluster components and the mono-valence nature of Cu centers. High-resolution XPS spectra of Cu 2p for  $\text{Cu}_{12}$  shifted to higher energy compared with that for  $\text{Cu}_6$ , which suggests that the electron density of Cu is lower in  $\text{Cu}_{12}$  than in  $\text{Cu}_6$ .

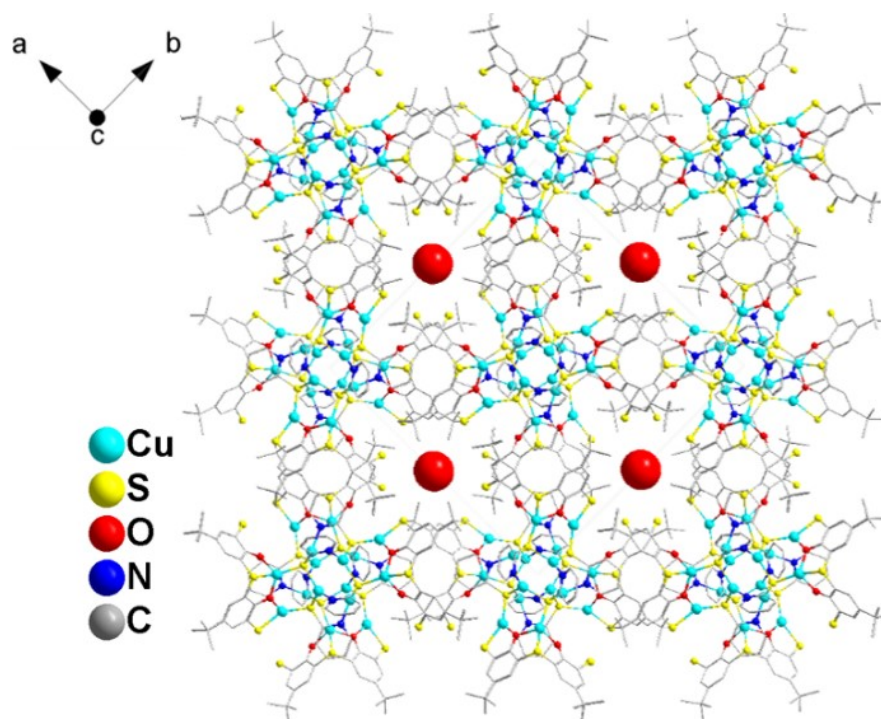

**Fig. S8** The packing diagrams of  $\text{Cu}_{12}$  along the c-axis. The red ball represents the solvent  $\text{H}_2\text{O}$  in the crystal lattice

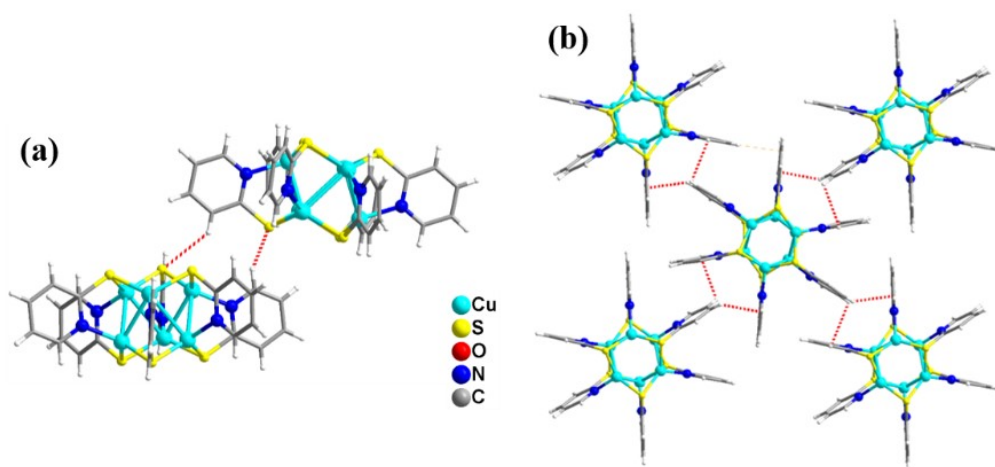

**Fig. S9** Two kinds of interactions between  $\text{Cu}_6$  clusters

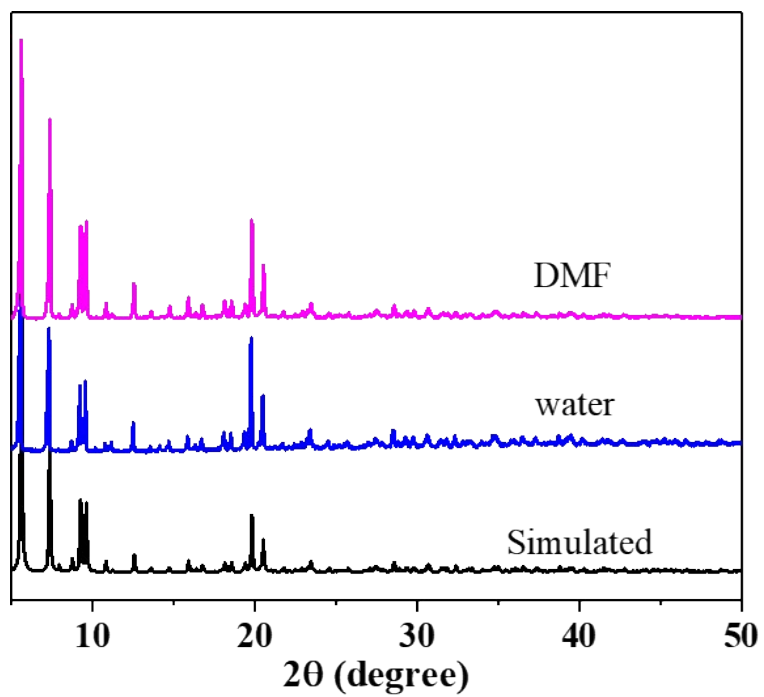

**Fig. S10.** PXRD pattern of  $\text{Cu}_{12}$  after the solvent photothermal experiments



## Tables

**Table S1.** Crystal data and structural refinement parameters

| Complex                                                            | <b>Cu<sub>12</sub></b>                                                                           | <b>Cu<sub>6</sub></b>                                                         |
|--------------------------------------------------------------------|--------------------------------------------------------------------------------------------------|-------------------------------------------------------------------------------|
| formula                                                            | C <sub>110</sub> H <sub>118</sub> N <sub>6</sub> Cu <sub>12</sub> O <sub>9</sub> S <sub>14</sub> | C <sub>30</sub> H <sub>24</sub> Cu <sub>6</sub> N <sub>6</sub> S <sub>6</sub> |
| Formula weight                                                     | 2877.40                                                                                          | 1042.15                                                                       |
| Crystal system                                                     | tetragonal                                                                                       | monoclinic                                                                    |
| space group                                                        | <i>P</i> 4 <sub>2</sub> / <i>m</i> <i>b</i> <i>c</i> (No.135)                                    | <i>P</i> 21/ <i>n</i> (No.14)                                                 |
| <i>a</i> (Å)                                                       | 22.2481(9)                                                                                       | 9.5857(8)                                                                     |
| <i>b</i> (Å)                                                       | 22.2481(9)                                                                                       | 16.0466(11)                                                                   |
| <i>c</i> (Å)                                                       | 24.0155(12)                                                                                      | 12.2754(10)                                                                   |
| $\alpha$ (°)                                                       | 90                                                                                               | 90                                                                            |
| $\beta$ (°)                                                        | 90                                                                                               | 108.900(2)                                                                    |
| $\gamma$ (°)                                                       | 90                                                                                               | 90                                                                            |
| Volume(Å <sup>3</sup> )                                            | 11887.1(11)                                                                                      | 1786.4(2)                                                                     |
| <i>Z</i>                                                           | 4                                                                                                | 2                                                                             |
| Temperature(K)                                                     | 296(2)                                                                                           | 296(2)                                                                        |
| <i>D<sub>c</sub></i> (g/cm <sup>3</sup> )                          | 1.608                                                                                            | 1.937                                                                         |
| $\mu$ (mm <sup>-1</sup> )                                          | 2.401                                                                                            | 3.891                                                                         |
| Reflections collected                                              | 51587                                                                                            | 26990                                                                         |
| Unique data                                                        | 5411                                                                                             | 3642                                                                          |
| <i>R</i> <sub>int</sub>                                            | 0.0820                                                                                           | 0.0644                                                                        |
| <i>GOF</i> on <i>F</i> <sup>2</sup>                                | 1.067                                                                                            | 0.993                                                                         |
| <sup>a</sup> <i>R</i> <sub>1</sub> [ <i>I</i> >2sigma( <i>I</i> )] | 0.0469                                                                                           | 0.0304                                                                        |
| <sup>b</sup> <i>wR</i> <sub>2</sub>                                | 0.1231                                                                                           | 0.0795                                                                        |

$$^a R_1 = \frac{\sum ||F_o| - |F_c||}{\sum |F_o|}; \quad ^b wR_2 = \left\{ \frac{\sum [w(F_o^2 - F_c^2)]^2}{\sum [w(F_o^2)]^2} \right\}^{1/2}$$

**Table S2** The selected bond lengths (Å) for **Cu<sub>12</sub>**

| Bond                                                                                      | Distance    | r     | Value | Bond                  | Distance    | r     | Value |
|-------------------------------------------------------------------------------------------|-------------|-------|-------|-----------------------|-------------|-------|-------|
| Cu1-O2                                                                                    | 1.992 (3)   | 1.679 | 0.429 | Cu2-O2 <sup>i</sup>   | 2.061 (3)   | 1.679 | 0.356 |
| Cu1-O1                                                                                    | 2.111 (4)   | 1.679 | 0.311 | Cu2-O2                | 2.061 (3)   | 1.679 | 0.356 |
| Cu1-S4                                                                                    | 2.1732 (14) | 1.86  | 0.429 | Cu2-S5                | 2.176 (2)   | 1.86  | 0.426 |
| Cu1-S1                                                                                    | 2.3409 (15) | 1.86  | 0.273 | Cu2-S2                | 2.310 (2)   | 1.86  | 0.296 |
| valence                                                                                   |             |       | 1.442 | valence               |             |       | 1.434 |
| Bond                                                                                      | Distance    | r     | Value | Bond                  | Distance    | r     | Value |
| Cu3-N1                                                                                    | 1.995 (5)   | 1.61  | 0.353 | Cu4-N2                | 1.985 (6)   | 1.61  | 0.363 |
| Cu3-S5 <sup>ii</sup>                                                                      | 2.2394 (14) | 1.86  | 0.359 | Cu4-S4 <sup>iii</sup> | 2.2474 (15) | 1.86  | 0.351 |
| Cu3-S4 <sup>iii</sup>                                                                     | 2.2434 (16) | 1.86  | 0.355 | Cu4-S4 <sup>ii</sup>  | 2.2474 (15) | 1.86  | 0.351 |
| valence                                                                                   |             |       | 1.067 | valence               |             |       | 1.065 |
| <b>Symmetry codes:</b> (i) $x, y, -z+1$ ; (ii) $-x+1, -y+1, -z+1$ ; (iii) $-x+1, -y+1, z$ |             |       |       |                       |             |       |       |

**Table S3** The selected bond angles for **Cu<sub>12</sub>**

| Band                    | Angles [ ° ] | Band                                     | Angles [ ° ] |
|-------------------------|--------------|------------------------------------------|--------------|
| O2-Cu1-O1               | 104.15 (15)  | Cu3 <sup>iii</sup> -S5-Cu3 <sup>ii</sup> | 101.67 (8)   |
| O2-Cu1-S4               | 118.57 (11)  | C1-O1-Cu1                                | 116.9 (3)    |
| O1-Cu1-S4               | 106.45 (11)  | C7-O2-Cu1                                | 116.6 (3)    |
| O2-Cu1-S1               | 87.60 (11)   | C7-O2-Cu2                                | 117.0 (3)    |
| O1-Cu1-S1               | 84.77 (10)   | Cu1-O2-Cu2                               | 125.55 (17)  |
| S4-Cu1-S1               | 146.45 (6)   | C25-N1-Cu3                               | 124.3 (4)    |
| O2 <sup>i</sup> -Cu2-O2 | 96.1 (2)     | C21-N1-Cu3                               | 117.7 (4)    |
| O2 <sup>i</sup> -Cu2-S5 | 112.47 (11)  | C26-N2-C30                               | 117.0 (7)    |
| O2-Cu2-S5               | 112.47 (11)  | C26-N2-Cu4                               | 118.8 (5)    |
| O2 <sup>i</sup> -Cu2-S2 | 86.84 (10)   | C30-N2-Cu4                               | 124.2 (6)    |

|                                           |             |                                           |             |
|-------------------------------------------|-------------|-------------------------------------------|-------------|
| O2-Cu2-S2                                 | 86.84 (10)  | C12 <sup>i</sup> -S2-Cu2                  | 95.20 (17)  |
| S5-Cu2-S2                                 | 149.87 (8)  | C21-S4-Cu1                                | 111.48 (18) |
| N1-Cu3-S5 <sup>ii</sup>                   | 123.66 (15) | C21-S4-Cu3 <sup>iii</sup>                 | 108.46 (18) |
| N1-Cu3-S4 <sup>iii</sup>                  | 120.59 (15) | Cu1-S4-Cu3 <sup>iii</sup>                 | 102.18 (6)  |
| S5 <sup>ii</sup> -Cu3-S4 <sup>iii</sup>   | 113.66 (6)  | C21-S4-Cu4 <sup>ii</sup>                  | 108.19 (18) |
| N1-Cu3-Cu3 <sup>iii</sup>                 | 86.32 (13)  | Cu1-S4-Cu4 <sup>ii</sup>                  | 122.82 (7)  |
| S5 <sup>ii</sup> -Cu3-Cu3 <sup>iii</sup>  | 127.95 (4)  | Cu3 <sup>iii</sup> -S4-Cu4 <sup>ii</sup>  | 102.36 (6)  |
| S4 <sup>iii</sup> -Cu3-Cu3 <sup>iii</sup> | 69.24 (4)   | C26-S5-Cu2                                | 116.6 (3)   |
| N1-Cu3-Cu4 <sup>ii</sup>                  | 87.60 (13)  | C26-S5-Cu3 <sup>iii</sup>                 | 108.52 (16) |
| S5 <sup>ii</sup> -Cu3-Cu4 <sup>ii</sup>   | 69.23 (5)   | Cu2-S5-Cu3 <sup>iii</sup>                 | 110.25 (6)  |
| S4 <sup>iii</sup> -Cu3-Cu4 <sup>ii</sup>  | 128.59 (5)  | C26-S5-Cu3 <sup>ii</sup>                  | 108.52 (16) |
| Cu3 <sup>iii</sup> -Cu3-Cu4 <sup>ii</sup> | 71.15 (3)   | Cu2-S5-Cu3 <sup>ii</sup>                  | 110.25 (6)  |
| N2-Cu4-S4 <sup>iii</sup>                  | 122.62 (5)  | S4 <sup>iii</sup> -Cu4-Cu3 <sup>iii</sup> | 68.55 (4)   |
| N2-Cu4-S4 <sup>ii</sup>                   | 122.62 (5)  | S4 <sup>ii</sup> -Cu4-Cu3 <sup>iii</sup>  | 126.50 (6)  |
| S4 <sup>iii</sup> -Cu4-S4 <sup>ii</sup>   | 113.49 (8)  | Cu3 <sup>ii</sup> -Cu4-Cu3 <sup>iii</sup> | 70.10 (4)   |
| N2-Cu4-Cu3 <sup>ii</sup>                  | 86.58 (14)  | C12-S2-Cu2                                | 95.20 (17)  |
| S4 <sup>iii</sup> -Cu4-Cu3 <sup>ii</sup>  | 126.50 (6)  | C8-S1-Cu1                                 | 93.36 (17)  |
| S4 <sup>ii</sup> -Cu4-Cu3 <sup>ii</sup>   | 68.55 (4)   | C6-S1-Cu1                                 | 95.80 (17)  |
| N2-Cu4-Cu3 <sup>iii</sup>                 | 86.58 (14)  | C6-S1-Cu1                                 | 95.80 (17)  |

**Symmetry codes:** (i)  $x, y, -z+1$ ; (ii)  $-x+1, -y+1, -z+1$ ; (iii)  $-x+1, -y+1, z$ .

**Table S4** Some recent reports on Cu-based coordination compounds/representative composites for photothermal conversion

| Compounds                                     | Light source                                | Sample status                   | Heating rate                                                       | Maximum temperature                   | Stability  | Reference                                          |
|-----------------------------------------------|---------------------------------------------|---------------------------------|--------------------------------------------------------------------|---------------------------------------|------------|----------------------------------------------------|
| <b>Cu<sub>12</sub></b>                        | 660 nm laser<br>0.4 W/cm <sup>2</sup>       | solid                           | 9.5 °C/s<br>in the first 5 s                                       | 124.5 °C                              | recyclable | <b>This work</b>                                   |
|                                               |                                             | 30 mg/mL in<br>H <sub>2</sub> O | 3.7 °C/min<br>1.0 °C/min (H <sub>2</sub> O)<br>in the first 10 min | 59.3 °C<br>33.8 °C (H <sub>2</sub> O) | -          |                                                    |
|                                               |                                             | 30 mg/mL in<br>DMF              | 4.8 °C/min<br>2.3 °C/min (DMF)<br>in the first 10 min              | 67.9 °C<br>45.1 °C (DMF)              | -          |                                                    |
| Cu <sub>4</sub> Cu <sup>II</sup>              | Xenon lamp<br>300 W                         | solid                           | 1.49 °C/min<br>in the first 10 min                                 | 46.3 °C                               | -          | <i>Inorg. Chim. Acta</i> , 2023, <b>545</b> 121270 |
| Cu <sub>6</sub> Cu <sup>II</sup> <sub>3</sub> |                                             |                                 | 1.95 °C/min<br>in the first 10 min                                 | 49.6 °C                               | -          |                                                    |
| Cu <sup>II</sup> <sub>6</sub> Cu <sub>3</sub> | Simulated sunlight 0.1<br>W/cm <sup>2</sup> | solid                           | 4.48 °C/min<br>in the first 10 min                                 | 78.2 °C                               | -          | <i>Inorg. Chem.</i> , 2023, <b>62</b> ,401–407     |
| Cu <sub>4</sub> Cu <sup>II</sup> -Ia          | xenon lamp<br>300 W                         | solid                           | 3.85 °C/min<br>in the first 10 min                                 | 60 °C                                 | -          | <i>Dalton Trans.</i> , 2022, <b>51</b> , 6053      |
| Cu <sub>4</sub> Cu <sup>II</sup> -Ib          |                                             |                                 |                                                                    |                                       | -          |                                                    |
| Cu <sub>4</sub> Cu <sup>II</sup> -Ic          |                                             |                                 | 2.71 °C/min<br>in the first 10 min                                 | 49.0 °C                               | -          |                                                    |
| Cu <sub>4</sub> Cu <sup>II</sup> -Id          |                                             |                                 | 3.85 °C/min<br>in the first 10 min                                 | 60 °C                                 | -          |                                                    |
| Cu <sub>4</sub> Cu <sup>II</sup> -IIa         |                                             |                                 |                                                                    |                                       | -          |                                                    |
| Cu <sub>4</sub> Cu <sup>II</sup> -IIb         |                                             |                                 | 4.63 °C/min<br>in the first 10 min                                 | 69.8 °C                               | -          |                                                    |
| Cu <sub>4</sub> Cu <sup>II</sup> -IIc         |                                             |                                 | 3.85 °C/min<br>in the first 10 min                                 | 60 °C                                 | -          |                                                    |
| Cu <sub>4</sub> Cu <sup>II</sup> -IId         |                                             |                                 |                                                                    |                                       | -          |                                                    |

|                                                     |                                        |                                  |                                     |         |            |                                                                   |
|-----------------------------------------------------|----------------------------------------|----------------------------------|-------------------------------------|---------|------------|-------------------------------------------------------------------|
| Cu <sup>II</sup> -1                                 | Xenon lamp<br>300 mW                   | solid                            | 1.8 °C/min<br>from the<br>beginning | 28 °C   | -          | <i>Inorg. Chim. Acta</i> , 2021, <b>526</b> , 120531              |
| Cu <sup>II</sup> -2                                 |                                        |                                  | 1 °C/min<br>from the beginning      | 27 °C   | -          |                                                                   |
| Cu <sup>II</sup> -3                                 |                                        |                                  | 2 °C/min<br>from the beginning      | 32 °C   | -          |                                                                   |
| Cu <sup>II</sup> -1                                 | Xenon lamp<br>300 mW                   | solid                            | 2 °C/min<br>from the beginning      | 40 °C   | -          | <i>Inorg. Chim. Acta</i> , 2020, <b>508</b> , 119608              |
| Cu <sup>II</sup> -2                                 |                                        |                                  | 0.9 °C/min<br>from the beginning    | 37 °C   | -          |                                                                   |
| Cu <sup>II</sup> -3                                 |                                        |                                  | 1.5 °C/min<br>from the beginning    | 36 °C   | -          |                                                                   |
| SD/Ag <sub>18a</sub>                                | 808 nm laser<br>0.35 W/cm <sup>2</sup> | solid                            | 84.3 °C/s<br>in the first 4 s       | 360 °C  | destroyed  | <i>Angew. Chem. Int. Ed.</i> ,<br>2022, <b>61</b> ,<br>e202200823 |
|                                                     | 808 nm laser<br>5.0 W/cm <sup>2</sup>  | 300 μM in DMF                    | 5.6 °C/min<br>in the first 5 min.   | 51 °C   | recyclable |                                                                   |
| Ag <sub>155</sub>                                   | 660 nm laser<br>0.1 W/cm <sup>2</sup>  | 240 μM in DMF                    | 7.82 °C/min<br>in the first 5 min.  | 59.1 °C | recyclable | <i>Angew. Chem. Int. Ed.</i> ,<br>2022, <b>61</b> ,<br>e202206742 |
| {Mo <sub>154</sub> }@CDC                            | 808 nm laser<br>1 W/cm <sup>2</sup>    | 0.204 mM in<br>H <sub>2</sub> O  | 8.4 °C/min<br>in the first 5 min.   | 67 °C   | recyclable | <i>Science Advances</i> , 2021, <b>7</b> , eabf8413               |
| PMo <sub>10</sub> V <sub>2</sub> @TMB <sub>CT</sub> | 808 nm laser<br>1 W/cm <sup>2</sup>    | 3.85 mg/mL)                      | 7.0 °C/min<br>in the first 4 min.   | 55 °C   | recyclable | <i>Chem. Eng. J.</i> 2022 <b>446</b> , 137134                     |
| W-POM NCs                                           | 808 nm laser<br>2.0 W                  | 300 mM in H <sub>2</sub> O       | 10 °C/min<br>in the first 3 min.    | 55 °C   | recyclable | <i>ACS Nano</i> 2020, <b>14</b> , 2126–2136                       |
| rPOMs@MSNs@copolymer                                | 808 nm laser<br>1.8 W/cm <sup>2</sup>  | 1.0 mg/mL in<br>H <sub>2</sub> O | 1.85 °C/min<br>in the first 10 min  | 43.5 °C | -          | <i>Adv. Healthcare Mater.</i> 2018, <b>7</b> ,<br>1800320         |
| W <sub>18</sub> O <sub>49</sub>                     | 980 nm laser<br>0.72 W/cm <sup>2</sup> | 3.0 mg/mL in<br>H <sub>2</sub> O | 8.24 °C/min<br>in the first 5 min.  | 61.2 °C | -          | <i>Adv. Mater.</i> 2013, <b>25</b> , 2095–2100                    |
